# Supplementary material for: Indolic Uremic Solutes Enhance Procoagulant Activity of Red Blood Cells through Phosphatidylserine Exposure and Microparticle Release
Source: PubMed Central journal article supplement (PMC4663509; doi:10.3390/toxins7114390), 2015-10-28
Supplement: toxins-07-04390-s001.pdf [file toxins-07-04390-s001.pdf]

## Supplementary Information

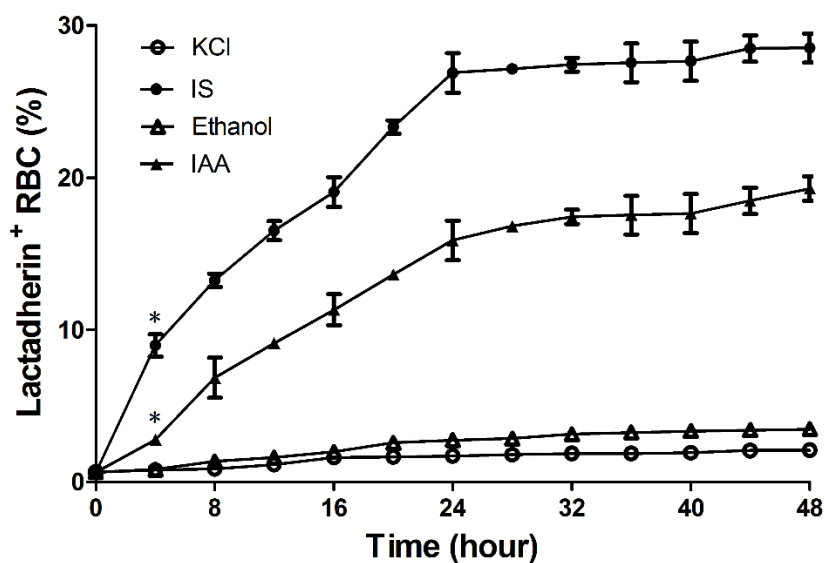

**Figure S1.** Kinetic analysis of PS exposure on RBC with different treatment. RBCs from healthy volunteers were incubated with IS (1 mM) and IAA (50  $\mu$ M) for 48h, respectively. KCl or ethanol was utilized as their respective controls. At indicated time points (0, 4, 8, 12, 16, 20, 24, 28, 32, 36, 40, 48 h), lactadherin -binding percent of RBCs was evaluated by flow cytometry. Each point represents mean  $\pm$  SD for four samples of independent experiments (\* $p < 0.001$ ). PS, phosphatidylserine; IS, Indoxyl sulfate; IAA, indoxyl-3-acetate acid; RBC, red blood cell.
